# Supplementary material for: 4-Perfluoroalkylbutoxybenzene derivatives as liquid crystalline organogelators based on phase-selective gelators
Source: Royal Society of Chemistry journal article supplement (doi:10.1039/c6nj00741d), 2016-01-01

**New J. Chem** – Supporting Information

## **4-Perfluoroalkylbutoxybenzene derivatives as liquid crystalline organogelators based on phase-selective gelators**

Banpeng Cao,<sup>a, b</sup> Yuta Kaneshige,<sup>a</sup> Yuya Matsue,<sup>a</sup> Yuki Morita<sup>a</sup> and Hiroaki Okamoto<sup>\*a</sup>

<sup>a</sup> *Graduate School of Science and Engineering, Yamaguchi University, 2-16-1, Tokiwadai, Ube Yamaguchi, Japan 755-8611*

<sup>b</sup> *Jiangxi Science and Technology Normal University. 605 Fenglin road, Nanchang, Jiangxi province, PR China 330013*

\*Corresponding author Email address: [oka-moto@po.cc.yamaguchi-u.ac.jp](mailto:oka-moto@po.cc.yamaguchi-u.ac.jp)

|                                                                                                                                                                     |    |
|---------------------------------------------------------------------------------------------------------------------------------------------------------------------|----|
| General information.....                                                                                                                                            | 1  |
| Scheme S1 Synthesis scheme for <b>1(n)-4(5)</b> .....                                                                                                               | 2  |
| Figure S1 Polarized photomicrographs of compounds <b>1(6)</b> and <b>3(6)</b> on cooling process.....                                                               | 6  |
| Table S1. The transition temperature (°C) and the associated enthalpies [kJ mol <sup>-1</sup> ] of compounds during the first scanning process <sup>[a]</sup> ..... | 7  |
| Figure S2 Differential scanning calorimetry during the first process for compounds <b>1(n)</b> and <b>3(6)</b> .....                                                | 8  |
| Table S2 Gelation test and critical gel concentration (CGC) of compounds <b>1(n)</b> in solvents <sup>a</sup> .....                                                 | 9  |
| Figure S3-1(n) Infrared spectra of the xerogels of compounds <b>1(n)</b> in cyclohexane compared with compounds <b>1(n)</b> .....                                   | 10 |
| Figure S4 <sup>1</sup> H NMR spectra of compound <b>1(5)</b> in <i>d</i> -DMSO.....                                                                                 | 11 |
| Table S3 Gelation test in aniline and oil using compounds <b>1(n)</b> <sup>a</sup> .....                                                                            | 12 |
| Figure S5 Photograph of gel formed at amine solution using compounds <b>1(n)</b> as gelators.....                                                                   | 13 |
| Figure S6-1(n) Photograph of gel formed at oil solution using compounds <b>1(n)</b> as gelators.....                                                                | 13 |
| Figure S7 Photograph of gel formed at biphasic mixture using compounds <b>1(n)</b> as gelators.....                                                                 | 14 |
| Figure S8-1(n) Photograph of gel formed at saturated solution using compounds <b>1(n)</b> as gelators.....                                                          | 15 |
| Figure S9 Photograph of gel formed at biphasic systems (Aniline/ water = 1:10) using the toluene solution of compounds <b>1(n)</b> as gelators.....                 | 16 |
| <sup>1</sup> H NMR Spectra.....                                                                                                                                     | 17 |

## General information

### Instrument and equipment

Melting point was obtained with a Yanaco MP-J3 micro melting point apparatus. Infrared spectra were recorded on a Shimadzu IR Prestige-21 spectrometer using KBr disc.  $^1\text{H}$  NMR spectra were recorded with JMN-LA500 (500 MHz) spectrometer, where tetramethylsilane was used as an internal standard. High resolution mass spectra (HRMS) were recorded with a Waters LCT Premier™ XE. Liquid crystalline properties were determined using a Seiko SSC-5200 DSC, where indium (99.9%) was used as a calibration standard (mp = 56 °C, 28.4 J g<sup>-1</sup>). The DSC thermogram was operated at a heating rate of 5 °C min<sup>-1</sup>. The mesophases were characterized when samples were heated up to clear points and then observed at a cooling rate of 5 °C min<sup>-1</sup> using a Nikon POH polarizing microscope fitted with a Mettler thermo-control system (FP-900). High performance liquid chromatograms were recorded on a Shimadzu Prominence HPLC System. Scanning electron microscope (SEM) images were observed with a JEOL JSM-6510LA operating at 200 kV using an accelerating voltage of 100 kV. The accelerating voltage of SEM was 5-15 kV.

### Materials

4,4'-Biphenol was purchased from wako Industries, Ltd. reagent chemicals; 4-bromo-1-butene, 1-bromopentane, 1-bromodecane, 4-pentyloxyphenol, 4-hexyloxyphenol, lithium aluminum hydride (LAH) and 2,2'-azobis(isobutyronitrile) (AIBN) were purchased from Tokyo Chemical Industry Co., Ltd. reagent chemicals; 1-Iodoperfluorohexane were purchased from Daikin Industries Ltd. reagent chemicals. Rape oil was purchased from Nisshin oil group Ltd. Other reagents and solvents were obtained from general commercial sources.

## Scheme S1 Synthesis scheme for 1(n)-4(5)

### Scheme S1-1(n) Synthesis route of compounds 1(n)

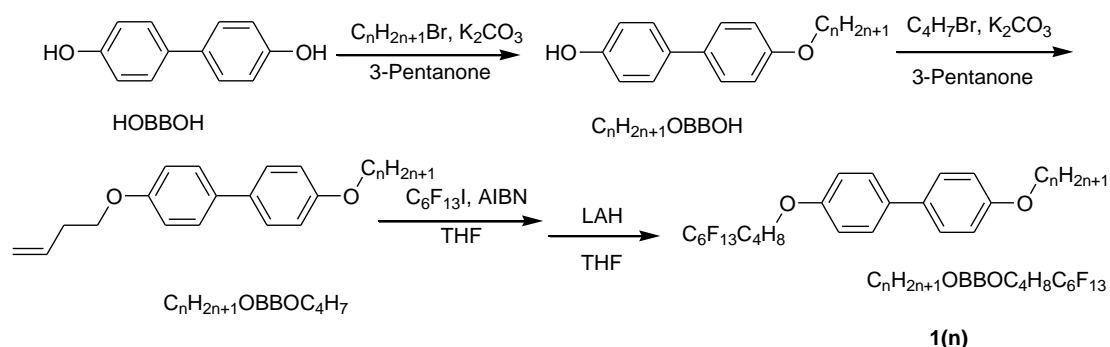

#### Preparation of C<sub>n</sub>H<sub>2n+1</sub>OBBOH

1-Bromoalkane (20 mmol) and potassium carbonate (4.14 g, 30 mmol) were added to a 3-pentanone solution (20 mL) of 4,4'-biphenol (3.72 g, 20 mmol) and stirred at 80 °C for one day. The precipitate of reaction mixture was removed by filtration, the filtrate was evaporated in *vacuo*, and the residue was purified by silica gel column chromatography, and recrystallization from CH<sub>3</sub>OH gave pure products.

#### Physical data of C<sub>5</sub>H<sub>11</sub>OBBOH

Yield = 50%, colorless needles, mp = 166-167 °C, IR (KBr, cm<sup>-1</sup>)  $\nu$  = 3346.5, 2956.8, 2933.7, 2864.3, 1502.6, 1271.1, 1253.7, 823.6.

<sup>1</sup>H NMR (500 MHz, CDCl<sub>3</sub>)  $\delta$  7.53-7.37 (m, 4H), 7.02-6.92 (m, 2H), 6.92-6.83 (m, 2H), 4.78 (s, 1H), 3.99 (t, *J* = 6.6 Hz, 2H), 1.87-1.72 (m, 2H), 1.54-1.33 (m, 4H), 0.94 (t, *J* = 7.1 Hz, 3H) ppm.

#### Physical data of C<sub>6</sub>H<sub>13</sub>OBBOH

Yield = 45%, colorless needles, mp = 155-156 °C, IR (KBr, cm<sup>-1</sup>)  $\nu$  = 3346.5, 2955.0, 2933.7, 2870.1, 1608.6, 1502.6, 1230.0, 816.0.

<sup>1</sup>H NMR (500 MHz, CDCl<sub>3</sub>)  $\delta$  7.45-7.41 (m, 4H), 6.94 (d, *J* = 8.6 Hz, 2H), 6.87 (d, *J* = 8.6 Hz, 2H), 5.02 (s, 1H), 3.98 (t, *J* = 6.6 Hz, 2H), 1.82-1.78 (m, 2H), 1.48-1.45 (m, 2H), 1.38-1.32 (m, 4H), 0.91 (t, *J* = 7.2 Hz, 3H) ppm.

#### Preparation of C<sub>n</sub>H<sub>2n+1</sub>OBBOC<sub>4</sub>H<sub>7</sub>

4-Bromo-1-butene (1.35 g, 10 mmol) and potassium carbonate (2.07 g, 15 mmol) were added to a 3-pentanone solution (10 mL) of C<sub>n</sub>H<sub>2n+1</sub>OBBOH (10 mmol) and refluxed for 2 days. The precipitate of reaction mixture was removed by filtration, the filtrate was evaporated in *vacuo*, and the residue was purified by silica gel column chromatography, and recrystallization from CH<sub>3</sub>OH gave pure products.

#### Physical data of C<sub>5</sub>H<sub>11</sub>OBBOC<sub>4</sub>H<sub>7</sub>

Yield = 30%, colorless needles, mp = 126-127 °C, IR (KBr, cm<sup>-1</sup>)  $\nu$  = 2958.8, 2933.7, 2873.9, 1606.7, 1500.6, 1275.0, 1248.0, 825.5.

<sup>1</sup>H NMR (500 MHz, CDCl<sub>3</sub>)  $\delta$  7.55-7.38 (m, 4H), 7.02-6.87 (m, 4H), 5.93 (ddt, *J* = 17.2, 10.4, 6.7 Hz, 1H), 5.19 (d, *J* = 17.2 Hz, 1H), 5.12 (d, *J* = 10.3 Hz, 1H), 4.05 (t, *J* = 6.7 Hz, 2H), 3.98 (t, *J* = 6.5 Hz, 2H), 2.63-2.51 (m, 2H), 1.81 (dd, *J* = 10.7, 4.0 Hz, 2H), 1.54-1.34 (m, 4H), 0.94 (t, *J* = 7.2 Hz, 3H) ppm.

ESI-TOF-MS: *m/z* calcd for C<sub>21</sub>H<sub>26</sub>O<sub>2</sub>, [M+H]<sup>+</sup>: 311.2011, found: 311.2004.

#### Physical data of C<sub>6</sub>H<sub>13</sub>OBBOC<sub>4</sub>H<sub>7</sub>

Yield = 35%, colorless needles, mp = 117-128 °C, IR (KBr, cm<sup>-1</sup>)  $\nu$  = 2955.0, 2933.7, 1606.7, 1500.6, 1273.0, 1248.0, 825.5.

<sup>1</sup>H NMR (500 MHz, CDCl<sub>3</sub>)  $\delta$  7.45-7.33 (m, 4H), 6.94-6.84 (m, 4H), 5.85 (ddt, *J* = 17.0, 10.3, 6.7 Hz, 1H), 5.12 (d, *J* = 17.0 Hz, 1H), 5.06 (d, *J* = 10.3 Hz, 1H), 3.98 (t, *J* = 6.7 Hz, 2H), 3.91 (t, *J* = 6.6 Hz, 2H), 2.52-2.47 (m, 2H), 1.81-1.62 (m, 2H), 1.47-1.36 (m, 2H), 1.30-1.28 (m, 4H), 0.88 (t, *J* = 7.2 Hz, 3H) ppm.

## Preparation of $C_nH_{2n+1}OBBOC_4H_8C_6F_{13}$

1-Iodoperfluorohexane (1.35 g, 3 mmol) and AIBN (0.50 g, 3 mmol) were added to a THF solution (4 mL) of  $C_nH_{2n+1}OBBOC_4H_7$  (3 mmol) and stirred at 70 °C under nitrogen for one day. The reaction was quenched with  $Na_2CO_3$  (aq.), diluted with ethyl acetate and rinsed with water twice and then with brine. After the organic layer was dried using anhydrous magnesium sulphate, the solvent was evaporated in *vacuo*. The residue without any other refined was dissolve in THF (anhydrous) to the next step. The mixture with  $LiAlH_4$  (1 eq.) stirred at room temperature for one day. The reaction quenched with  $NH_4Cl$  (aq.). The mixture was filtered and the filtrate was evaporated in *vacuo*. The residue was purified by silica gel column chromatography, and recrystallization from  $CH_3OH$  gave pure products.

Physical date of  $C_5H_{11}OBBOC_4H_8C_6F_{13}$

Yield = 35%, colorless needles, IR (KBr,  $cm^{-1}$ )  $\nu$  = 2958.8, 2933.7, 2875.9, 1606.7, 1500.6, 1273.0, 1246.0, 1211.3, 1190.1, 1180.2, 1143.8, 1037.7, 823.6, 700.2.

$^1H$  NMR (500 MHz,  $CDCl_3$ )  $\delta$  7.59-7.38 (m, 4H), 7.01-6.86 (m, 4H), 4.03 (t,  $J$  = 5.8 Hz, 2H), 3.98 (t,  $J$  = 6.6 Hz, 2H), 2.17 (m, 2H), 1.84 (m, 6H), 1.51-1.31 (m, 4H), 0.94 (t,  $J$  = 7.1 Hz, 3H) ppm.

ESI-TOF-MS:  $m/z$  calcd for  $C_{27}H_{27}F_{13}O_2$ ,  $[M+HCOO]^-$ : 675.1780, found: 675.1789.

Physical date of  $C_6H_{13}OBBOC_4H_8C_6F_{13}$

Yield = 40%, colorless needles, IR (KBr,  $cm^{-1}$ )  $\nu$  = 2931.8, 2875.9, 1606.7, 1500.6, 1273.0, 1247.9, 1190.1, 1143.8, 1041.6, 825.5, 700.2.

$^1H$  NMR (500 MHz,  $CDCl_3$ )  $\delta$  7.48-4.73 (m, 4H), 7.02- 6.88 (m, 4H), 4.04 (t,  $J$  = 5.9 Hz, 2H), 3.99 (t,  $J$  = 6.6 Hz, 2H), 2.22-2.11 (m, 2H), 1.91-1.70 (m, 6H), 1.54-1.43 (m, 2H), 1.42-1.29 (m, 4H), 0.94 (m,  $J$  = 7.2 Hz, 3H) ppm.

ESI-TOF-MS:  $m/z$  calcd for  $C_{28}H_{29}F_{13}O_2$ ,  $[M+HCOO]^-$ : 689.1937, found: 689.1940.

## Scheme S1-2(n) Synthesis route of compounds **2(n)**

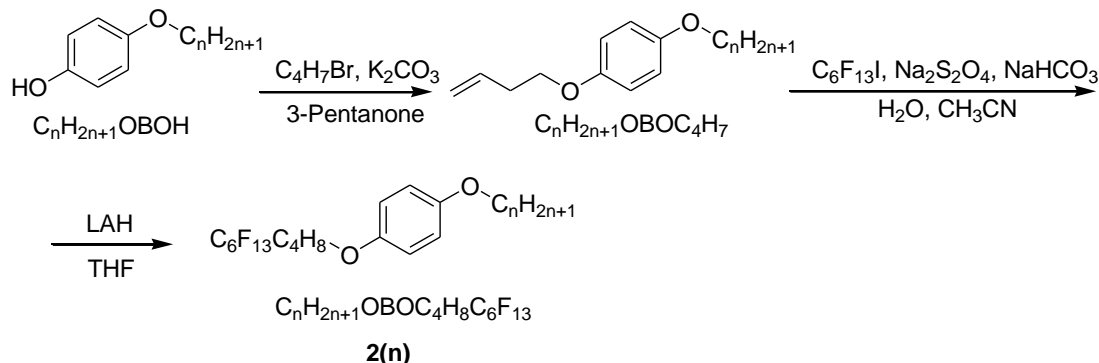

## Preparation of $C_nH_{2n+1}OBOC_4H_7$

4-Bromo-1-butene (5.40 g, 40 mmol) and potassium carbonate (5.52 g, 40 mmol) were added to a 3-pentanone solution (40 mL) of 4-pentyloxyphenol (or 4-hexyloxyphenol) (40 mmol) and the reaction mixture was refluxed for 2 days. The precipitate of reaction mixture was removed by filtration, the filtrate was evaporated in *vacuo*, and the residue was purified by silica gel column chromatography, and recrystallization from  $CH_3OH$  gave pure products.

Physical date of  $C_5H_{11}OBOC_4H_7$

Yield = 40 %, a colorless oil.

$^1H$ NMR (500 MHz,  $CDCl_3$ )  $\delta$  = 6.82 (s, 4H), 5.90 (ddt,  $J$  = 17.1, 10.1, 6.6 Hz, 1H), 5.16 (d,  $J$  = 17.1 Hz, 1H), 5.10 (d,  $J$  = 10.1 Hz, 1H), 3.96 (t,  $J$  = 6.6 Hz, 2H), 3.89 (t,  $J$  = 6.4 Hz, 2H), 2.51 (m, 2H), 1.75 (m, 2H), 1.33-1.46 (m, 4H), 0.92 (t,  $J$  = 6.9 Hz, 3H) ppm.

Physical date of  $C_6H_{13}OBOC_4H_7$

Yield = 43 %, a colorless oil.

$^1\text{H}$  NMR (500 MHz,  $\text{CDCl}_3$ )  $\delta$  7.07 (t,  $J = 5.6$  Hz, 2H), 6.89-6.76 (m, 2H), 5.90 (ddt,  $J = 17.1, 10.1, 6.7$  Hz, 1H), 5.16 (d,  $J = 17.1$  Hz, 1H), 5.09 (d,  $J = 10.1$  Hz, 1H), 3.99 (t,  $J = 6.7$  Hz, 2H), 2.56-2.48 (m, 4H), 1.57 (t,  $J = 7.2$  Hz, 2H), 1.33-1.27 (m, 6H), 0.87 (t,  $J = 7.2$  Hz, 3H) ppm.

#### Preparation of $\text{C}_n\text{H}_{2n+1}\text{OBOC}_4\text{H}_8\text{C}_6\text{F}_{13}$

1-Iodoperfluorohexane (4.80 g, 8.79 mmol), sodium hydrogen carbonate (0.70 g, 8.69 mmol) and hydrosulfite sodium (1.50 g, 8.79 mmol) were added to an acetonitrile (8.5 ml) and water (5.5 ml) solution of the compound ( $\text{C}_n\text{H}_{2n+1}\text{OBOC}_4\text{H}_7$ ) (8.77 mmol) and stirred under shielded light for one night. The reaction solution was quenched with  $\text{Na}_2\text{CO}_3$  (aq.), diluted with ethyl acetate and rinsed with water twice and then with brine. After the organic layer was dried using anhydrous magnesium sulphate, the solvent evaporated in *vacuo*. The residue without any other refined was dissolved in THF (anhydrous) to the next step. The mixture with  $\text{LiAlH}_4$  (1 eq.) stirred at room temperature for one day. The reaction quenched with  $\text{NH}_4\text{Cl}$  (aq.). The mixture was filtered and the filtrate was evaporated in *vacuo*. The residue was purified by silica gel column chromatography, and recrystallization from  $\text{CH}_3\text{OH}$  gave pure products.

Physical date of  $\text{C}_5\text{H}_{11}\text{OBOC}_4\text{H}_8\text{C}_6\text{F}_{13}$

Yield = 25 %, colorless needles, mp = 42-43°C, IR (KBr,  $\text{cm}^{-1}$ )  $\nu = 2952.5, 2913.9, 2873.4, 1508.1, 1238.1, 1209.1, 1149.4$ .

$^1\text{H}$ NMR (270 MHz,  $\text{CDCl}_3$ )  $\delta = 6.82$  (s, 4H), 3.92 (t,  $J = 7.0$  Hz, 2H), 3.90 (t,  $J = 7.0$  Hz, 2H), 2.15 (m, 2H), 1.70-1.90 (m, 6H), 1.30-1.45 (m, 4H), 0.93 (t,  $J = 7.0$  Hz, 3H) ppm.

ESI-TOF-MS: m/z calcd for  $\text{C}_{21}\text{H}_{23}\text{F}_{13}\text{O}_2$ ,  $[\text{M}-\text{H}]^-$ : 553.1412, found: 553.1413.

Physical date of  $\text{C}_6\text{H}_{13}\text{OBOC}_4\text{H}_8\text{C}_6\text{F}_{13}$

Yield = 20%, a colorless oil.

$^1\text{H}$  NMR (500 MHz,  $\text{CDCl}_3$ )  $\delta$  7.13-7.11 (m, 2H), 6.85-6.83 (m, 2H), 3.99 (t,  $J = 5.6$  Hz, 2H), 2.68-2.51 (m, 2H), 2.20-2.18 (m, 2H), 1.87 (t,  $J = 10.6$  Hz, 4H), 1.62 (d,  $J = 6.4$  Hz, 2H), 1.34 (s, 6H), 0.92 (t,  $J = 6.6$  Hz, 3H) ppm.

ESI-TOF-MS: m/z calcd for  $\text{C}_{22}\text{H}_{25}\text{F}_{13}\text{O}_2$ ,  $[\text{M}-\text{H}]^-$ : 567.1569, found: 567.1575.

#### Scheme S1-3(n) Synthesis route of compounds **3(n)**

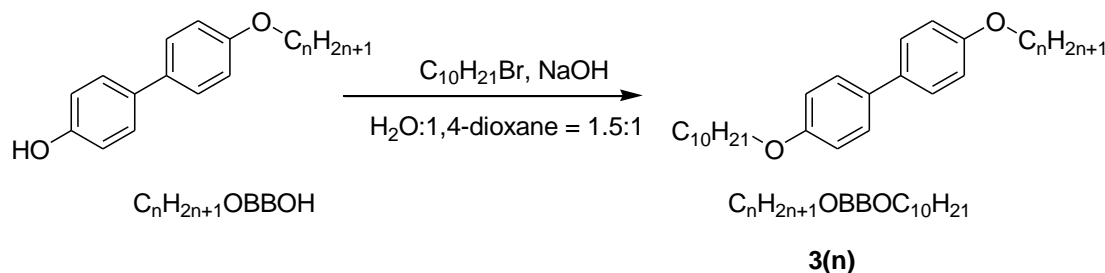

#### Preparation of $\text{C}_5\text{H}_{11}\text{OBBOC}_{10}\text{H}_{21}$

1,4-Dioxane of  $\text{C}_n\text{H}_{2n+1}\text{OBBOH}$  (20 mmol) was dissolved in a solution of  $\text{NaOH}$  (1 mol/L, 20 mL), 40 mL water and 40 mL 1,4-dioxane, then 1-bromodecane (20 mmol) was added and stirred at 70 °C for one day. The mixture was poured into 200 mL ice water. The precipitate of reaction mixture was removed by filtration, the filtrate was evaporated in *vacuo*, and the residue was purified by silica gel column chromatography, and recrystallization from  $\text{CH}_3\text{OH}$  gave pure products.

Physical date of  $\text{C}_5\text{H}_{11}\text{OBBOC}_{10}\text{H}_{21}$

Yield = 65 %, colorless needles, mp = 107-108 °C, IR (KBr,  $\text{cm}^{-1}$ )  $\nu = 2956.9, 2935.7, 2850.8, 1608.6, 1500.6, 1275.0, 1251.8, 1033.9, 825.5$ .

$^1\text{H}$  NMR (500 MHz,  $\text{CDCl}_3$ )  $\delta$  7.45 (d,  $J = 8.6$  Hz, 4H), 6.94 (d,  $J = 8.6$  Hz, 4H), 3.98 (t,  $J = 6.6$  Hz, 4H), 1.88-1.73 (m, 4H), 1.51-1.18 (m, 19H), 0.94 (t,  $J = 7.1$  Hz, 3H), 0.88 (t,  $J = 6.8$  Hz, 3H) ppm.

ESI-TOF-MS: m/z calcd for  $\text{C}_{27}\text{H}_{40}\text{O}_2$ ,  $[\text{M}+\text{H}]^+$ : 397.3107, found: 397.3099.

Physical data of  $C_6H_{13}OBBOC_{10}H_{21}$

Yield = 70 %, colorless needles, IR (KBr,  $cm^{-1}$ )  $\nu$  = 2955.0, 2933.7, 2872.0, 2362.8, 1606.7, 1500.6, 1273.0, 1251.8, 1039.7, 825.5.

$^1H$  NMR (500 MHz,  $CDCl_3$ )  $\delta$  7.45 (d,  $J$  = 8.6 Hz, 4H), 6.94 (d,  $J$  = 8.6 Hz, 4H), 3.98 (t,  $J$  = 6.6 Hz, 4H), 2.01-1.71 (m, 4H), 1.56-1.21 (m, 20H), 1.13-0.77 (m, 6H) ppm.

ESI-TOF-MS:  $m/z$  calcd for  $C_{28}H_{42}O_2$ ,  $[M+H]^+$ : 411.3263, found: 411.3252.

### Scheme S1-4(5) Synthesis route of compound **4(5)**

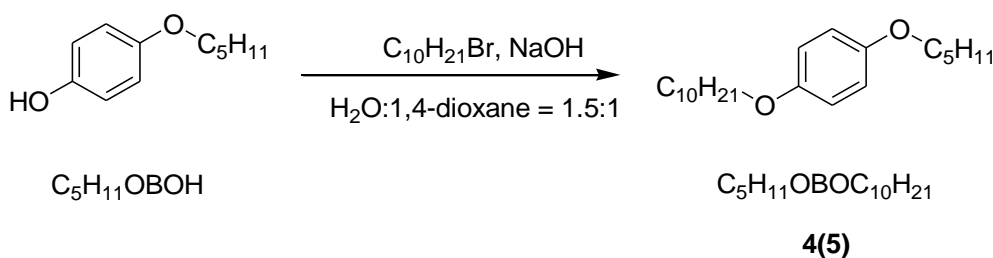

### Preparation of $C_5H_{11}OBBOC_{10}H_{21}$

1,4-Dioxane of  $C_5H_{11}OBOH$  (20 mmol) was dissolved in a solution of NaOH (1 mol/L, 20 mL), 40 mL water and 40 mL 1,4-dioxane, then 1-bromodecane (20 mmol) was added and stirred at 70 °C for one day. The reaction solution was poured into 200 mL ice water, diluted with ethyl acetate and rinsed with water twice and then with brine. After the organic layer was dried using anhydrous magnesium sulphate, the solvent was evaporated in *vacuo*, and refined by silica gel column chromatography to obtain a compound, and recrystallization from  $CH_3OH$  gave pure products.

Physical data of  $C_5H_{11}OBBOC_{10}H_{21}$

Yield = 25 %, colorless needles, mp = 46-47 °C, IR (KBr,  $cm^{-1}$ )  $\nu$  = 2956.9, 2935.7, 2850.8, 1512.2, 1475.5, 1290.4, 1242.2, 1030.0, 825.5, 771.5.

$^1H$  NMR (500 MHz,  $CDCl_3$ )  $\delta$  6.82 (s, 4H), 3.91-3.88 (m, 4H), 1.77-1.73 (m, 4H), 1.52-1.27 (m, 18H), 0.93 (t,  $J$  = 7.2 Hz, 3H), 0.88 (t,  $J$  = 6.8 Hz, 3H) ppm.

ESI-TOF-MS:  $m/z$  calcd for  $C_{21}H_{36}O_2$ ,  $[M+NH_4]^+$ : 338.3059, found: 338.3065.

Figure S1 Polarized photomicrographs of compounds **1(6)** and **3(6)** on cooling process

Figure S1-1(6) Polarized photomicrographs of compound **1(6)** on cooling process at: (a) 120 °C, (b) 110 °C, (c) & (d) 100 °C, (e) & (f) 85 °C.

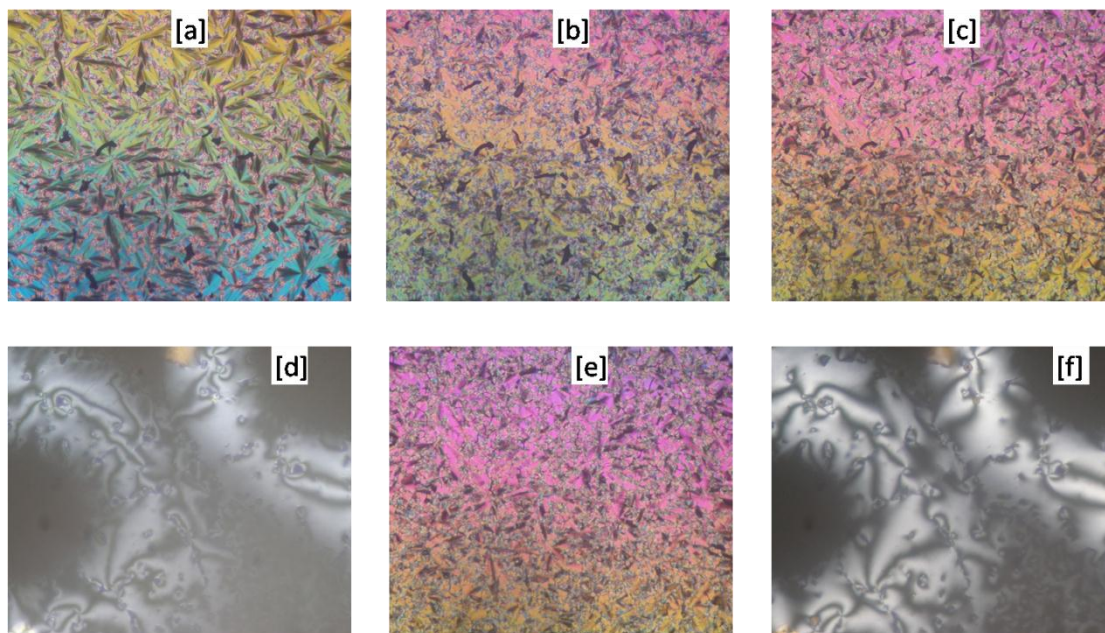

Figure S1-3(6) Polarized photomicrographs of compound **3(6)** on cooling process at: (a) 108 °C, (b) 107 °C.

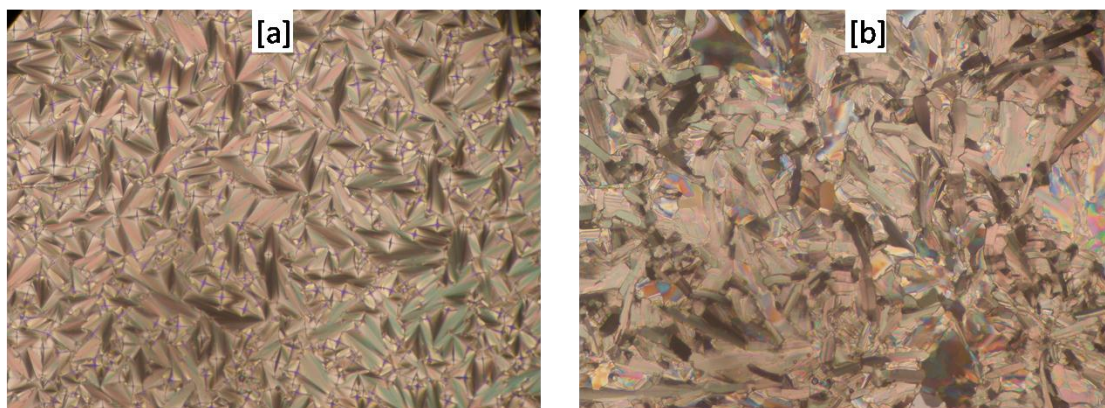



Table S1. The transition temperature (°C) and the associated enthalpies [kJ mol<sup>-1</sup>] of compounds during the first scanning process<sup>[a]</sup>

| Compound    | Heating/Cooling process | Transition temperature (°C) and $\Delta H$ [kJ mol <sup>-1</sup> ]                         |
|-------------|-------------------------|--------------------------------------------------------------------------------------------|
| <b>1(5)</b> | H                       | Cryst. 87[11.7] SmX 97[2.3] SmC 108[2.3] SmA(1) 112[-] <sup>[b]</sup> SmA(2) 163[11.2] Iso |
|             | C                       | Cryst. 79[4.1] SmX 94[2.4] SmC 105[2.3] SmA(1) 110[-] <sup>[b]</sup> SmA(2) 160[11.3] Iso  |
| <b>1(6)</b> | H                       | Cryst. 93[13.0] Sm C 108[2.7] SmA(1) 118[0.5] SmA(2) 159[10.4] Iso                         |
|             | C                       | Cryst. 79[10.1] SmX 86[1.7] SmC 106[2.8] SmA(1) 115[0.5] SmA(2) 156[10.7] Iso              |
| <b>3(6)</b> | H                       | Cryst. 111[25.3] Iso                                                                       |
|             | C                       | Cryst. 106[22.6] SmA 108[7.2] Iso                                                          |

[a] Peak temperatures from DSC at a rate of 5 °C min<sup>-1</sup>; [b] The enthalpy change was contained in Sm A(1)→Sm A(2); abbreviations: Cryst = crystalline solid; SmX = unidentified smectic phase; SmC = smectic C phase; SmA = smectic A phase; Iso = isotropic liquid.

Figure S2 Differential scanning calorimetry during the first process for compounds **1(n)** and **3(6)**

Figure S2-1(5) Differential scanning calorimetry during the first process for compound **1(5)**

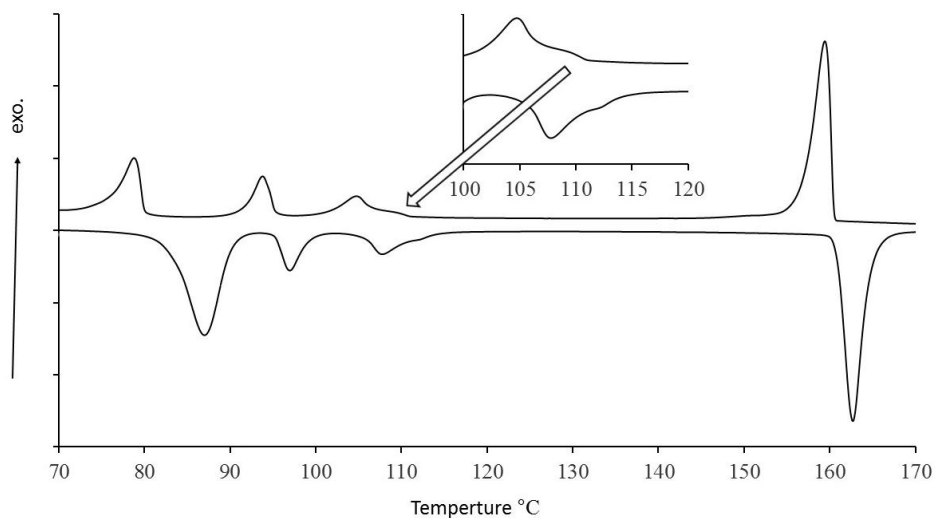

Figure S2-1(6) Differential scanning calorimetry during the first process for compound **1(6)**

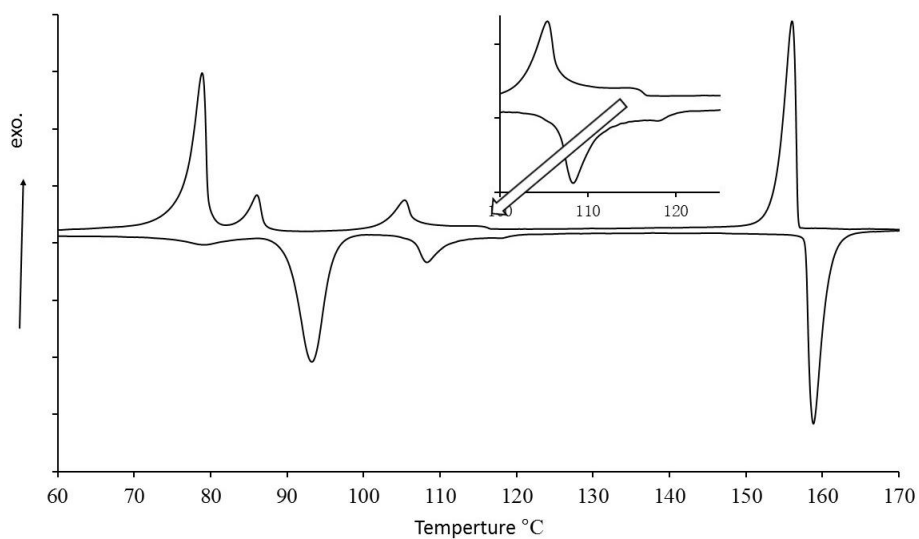

Figure S2-3(6) Differential scanning calorimetry during the first process for compound **3(6)**

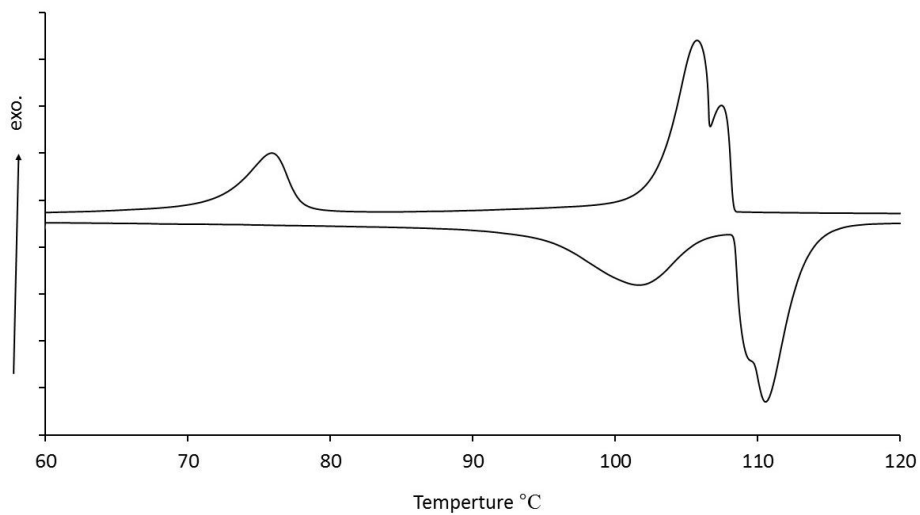

Table S2 Gelation test and critical gel concentration (CGC) of compounds **1(n)** in solvents<sup>a</sup>

| Solvents         | <b>1(5)</b> /wt% | <b>1(6)</b> /wt% |
|------------------|------------------|------------------|
| Cyclohexane      | G(4.0)           | G(4.0)           |
| Octane           | G(3.0)           | G(2.0)           |
| THF              | S(5.0)           | S(5.0)           |
| Toluene          | S(5.0)           | S(5.0)           |
| Methanol         | Ins(5.0)         | Ins(5.0)         |
| 1-Octanol        | G(0.7)           | G(0.6)           |
| DMF              | G(2.0)           | G(1.0)           |
| DMSO             | G(2.0)           | Ins(5.0)         |
| PC <sup>b</sup>  | G(0.6)           | Ins(5.0)         |
| GBL <sup>c</sup> | G(0.5)           | G(0.5)           |

<sup>a</sup> G = gelation, S = soluble, Ins = insoluble; <sup>b</sup> PC = propylene carbonate; <sup>c</sup> GBL = butyrolactone.

Figure S3-1(n) Infrared spectra of the xerogels of compounds **1(n)** in cyclohexane compared with compounds **1(n)**

Figure S3-1(5) Infrared spectra of the xerogels of compound **1(5)** compared with compound **1(5)**

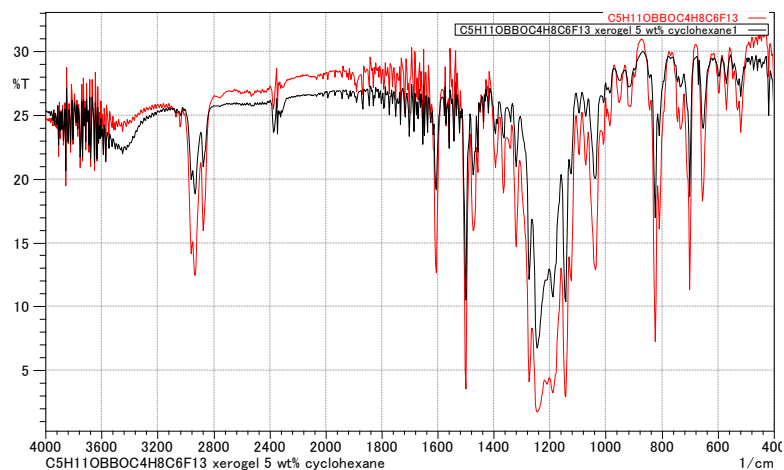

Red one is compound **1(5)**, black one is xerogel of compound **1(5)** at 5 wt% in cyclohexane.

Figure S3-1(6) Infrared spectra of the xerogels of compound **1(6)** compared with compound **1(6)**

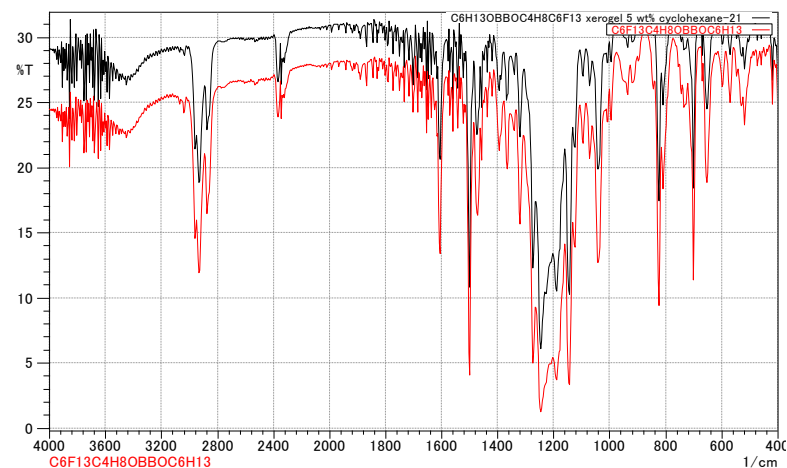

Red one is compound **1(6)**, black one is xerogel of compound **1(6)** at 5 wt% in cyclohexane.

## Figure S4 1H NMR spectra of compound **1(5)** in *d*-DMSO

Figure S4-1 At different temperatures

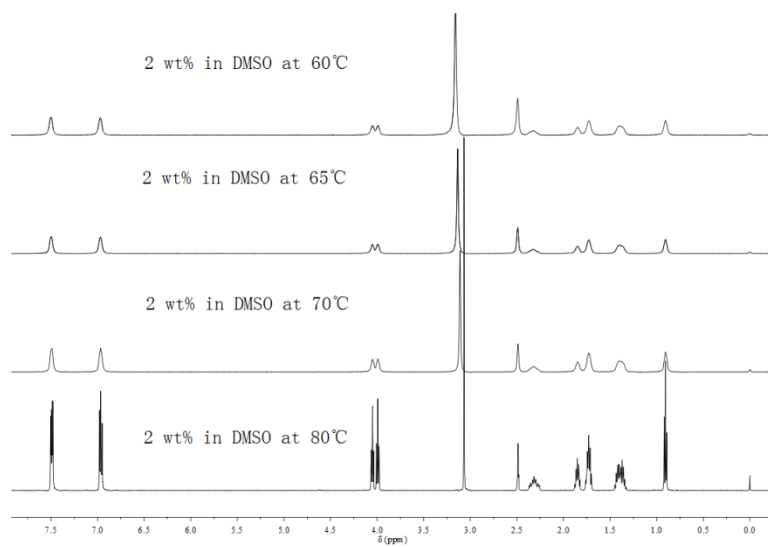

Figure S4-2 At different concentration

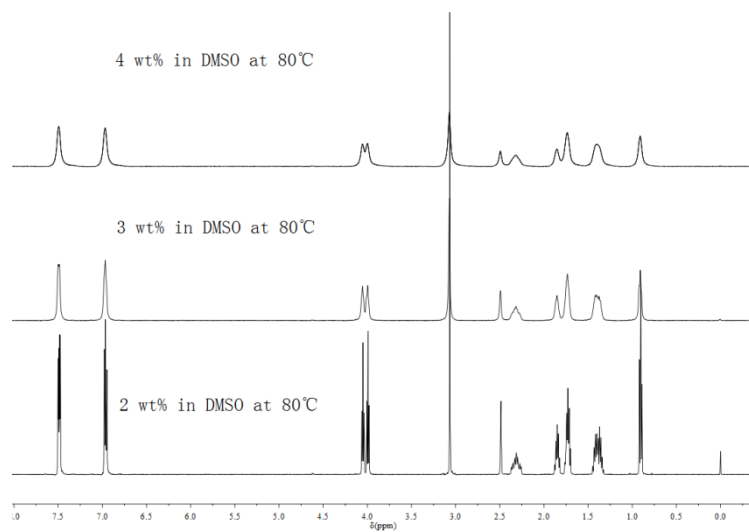

Table S3 Gelation test in aniline and oil using compounds **1(n)**<sup>a</sup>

| Solvents                 | <b>1(5)</b> /wt% | <b>1(6)</b> /wt% |
|--------------------------|------------------|------------------|
| Aniline                  | G(1.0)           | G(1.0)           |
| Benzylamine              | G(1.0)           | G(1.0)           |
| β-phenylethylamine       | G(1.0)           | G(1.0)           |
| Piperidine               | G(1.0)           | G(1.0)           |
| HMPA <sup>b</sup>        | S(5.0)           | G(5.0)           |
| N-ethyl-diisopropylamine | G(5.0)           | S(5.0)           |
| Synthetic lubricant      | G(1.0)           | G(1.0)           |
| Mineral oil              | G(1.0)           | G(1.0)           |
| Lamp oil                 | G(5.0)           | G(5.0)           |
| Polyolefin               | G(1.0)           | G(1.0)           |
| Rape oil                 | G(1.0)           | G(1.0)           |

<sup>a</sup> G = gelation, S = soluble, <sup>b</sup>HMPA = hexamethylphosphoric triamide.

Figure S5 Photograph of gel formed at amine solution using compounds **1(n)** as gelators

A: aniline, B: benzylamine, C:  $\beta$ -phenylethylamine, D: HMPA.

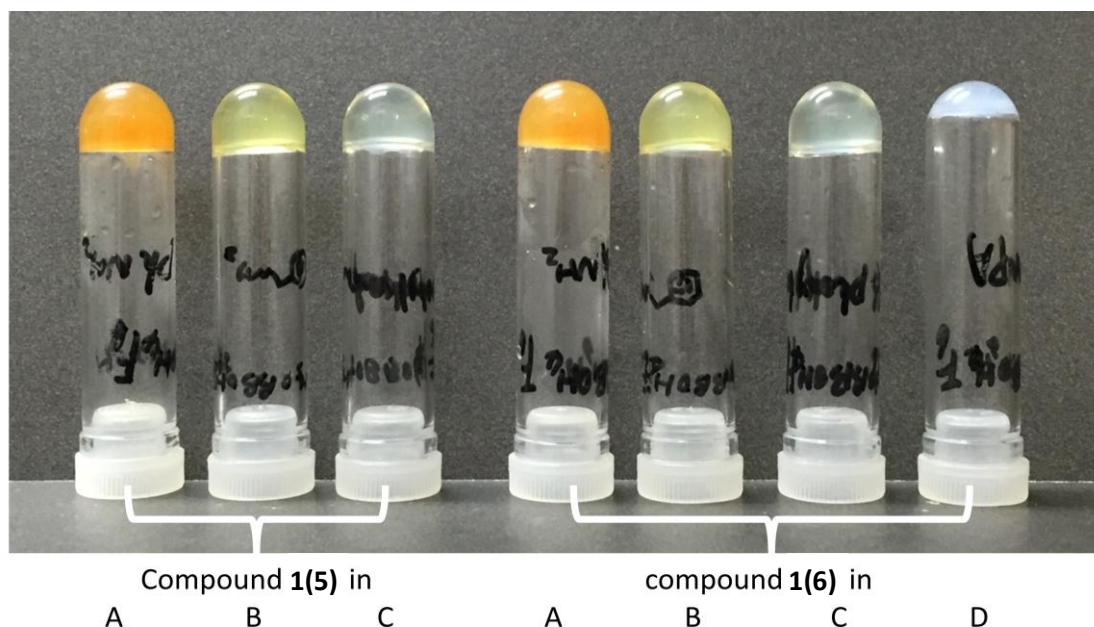

Figure S6-1(n) Photograph of gel formed at oil solution using compounds **1(n)** as gelators

A: synthetic lubricant, B: mineral oil, C: lamp oil, D: polyolefin, E: rape oil.

Figure S6-1(5) Photograph of gel formed at oil solution using compound **1(5)**

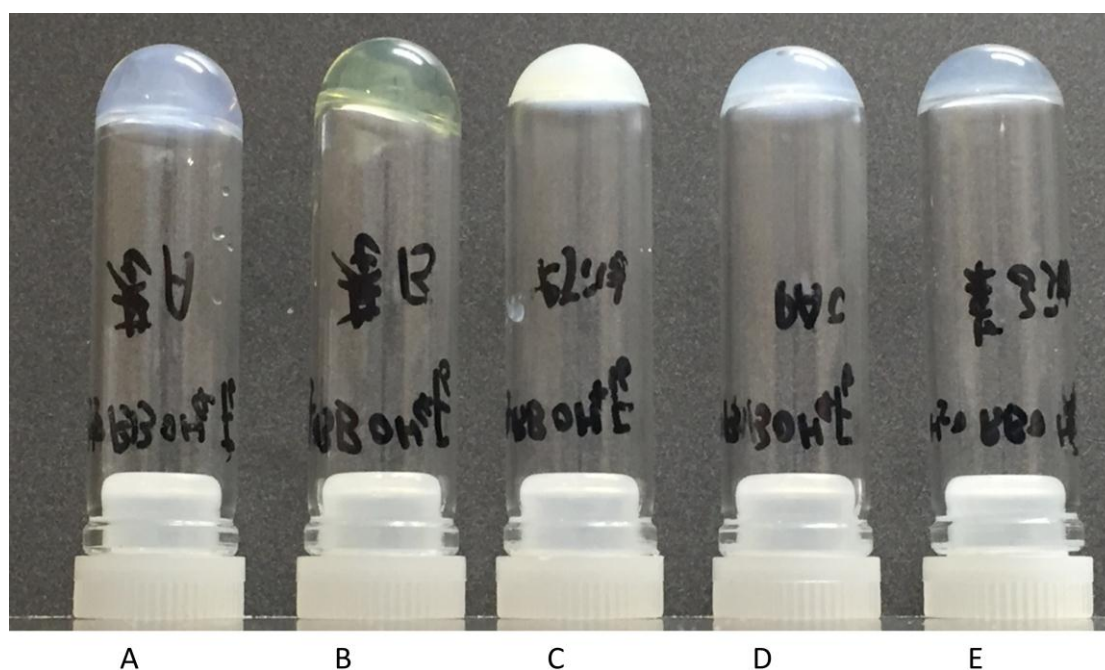

Figure S6-1(6) Photograph of gel formed at oil solution using compound **1(6)** as gelator

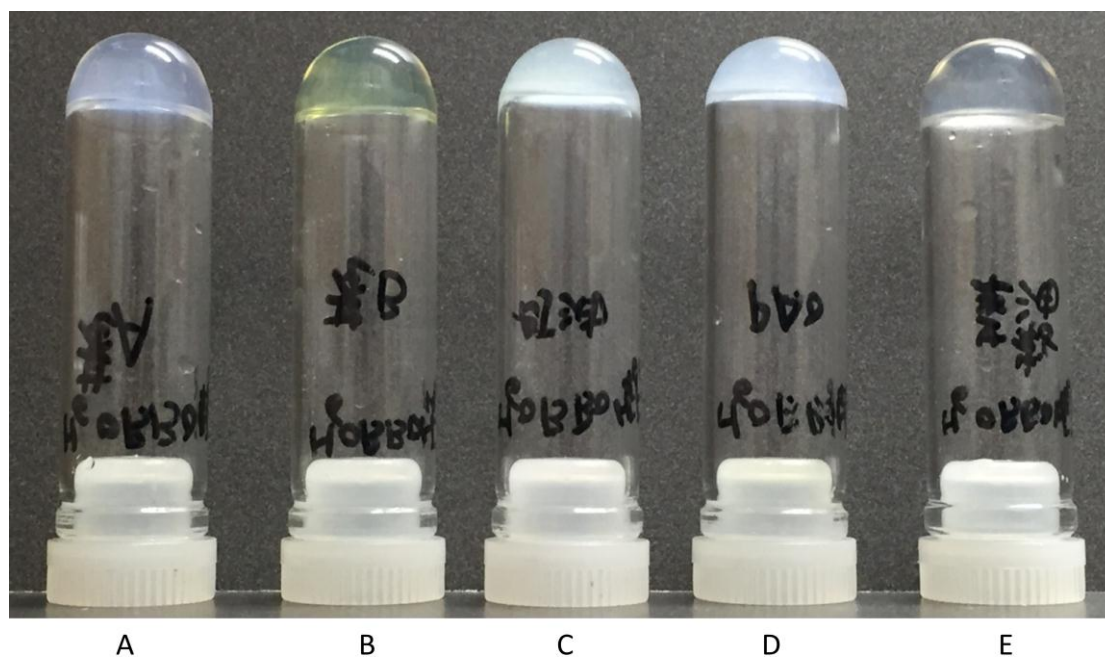

Figure S7 Photograph of gel formed at biphasic mixture using compounds **1(n)** as gelators

A: aniline, B: benzylamine, C:  $\beta$ -phenylethylamine.

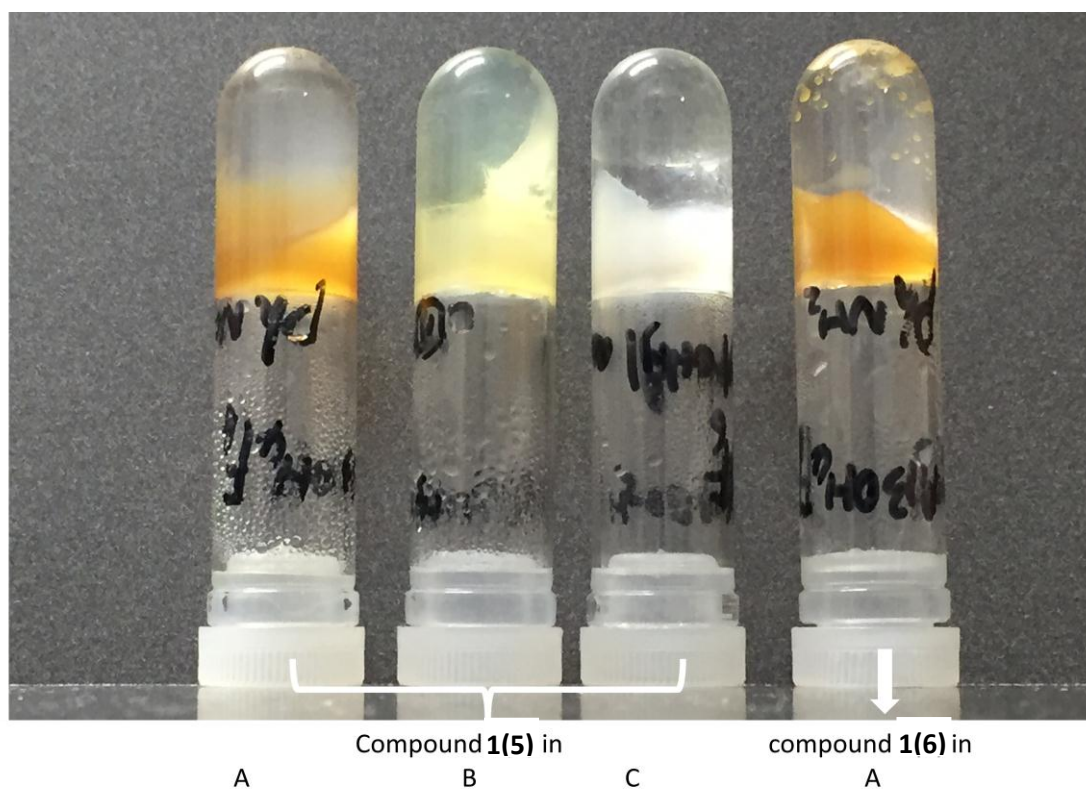



Figure S8-1(n) Photograph of gel formed at saturated solution using compounds **1(n)** as gelators

Saturated solution: NaCl and NaHCO<sub>3</sub>

A: synthetic lubricant, B: mineral oil, C: lamp oil, D: polyolefin, E: rape oil.

Figure S8-1(5) Photograph of gel formed at saturated solution using compound **1(5)**

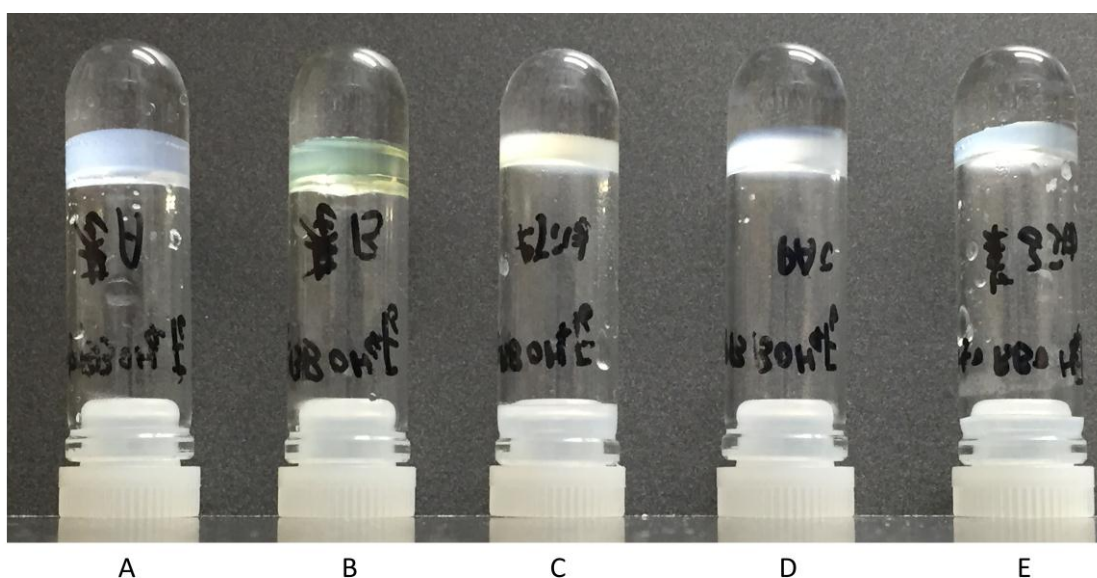

Figure S8-1(6) Photograph of gel formed at saturated solution using compound **1(6)** as gelator.

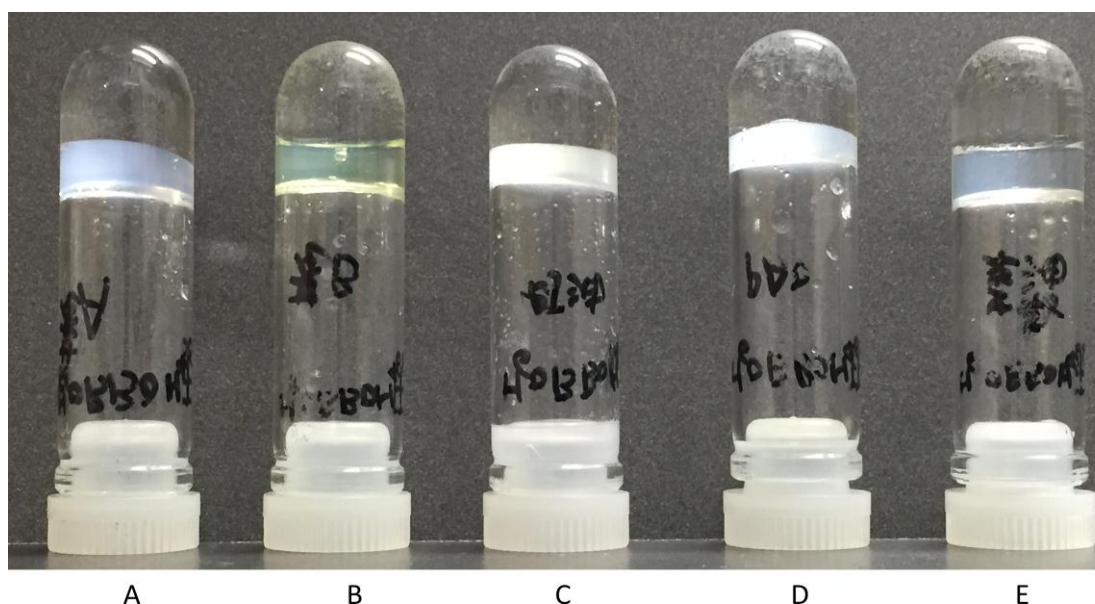

Figure S9 Photograph of gel formed at biphasic systems (Aniline/ water = 1:10) using the toluene solution of compounds **1(n)** as gelators

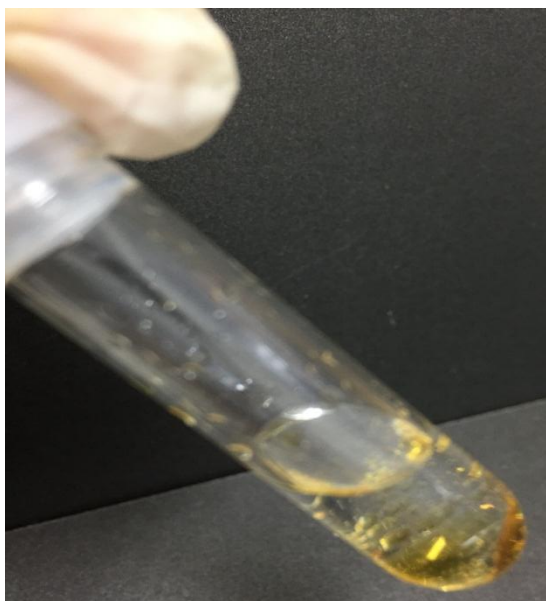

biphasic systems (Aniline/ water = 1:10)

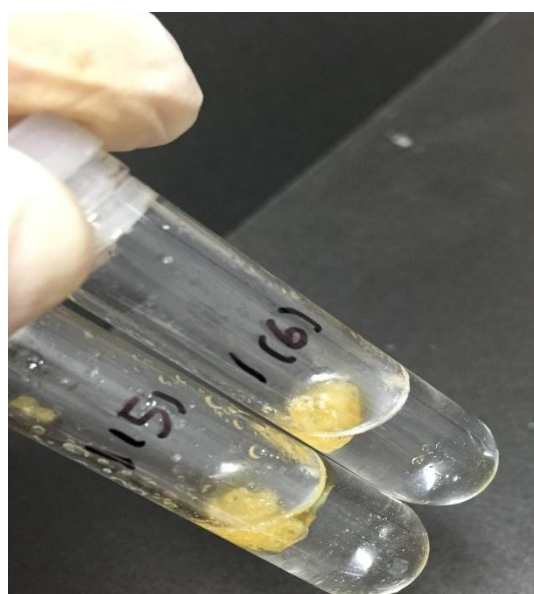

Photograph of gel

1(5): gel formed by toluene solution of compound **1(5)**;

1(6): gel formed by toluene solution of compound **1(6)**.

# $^1\text{H}$ NMR Spectra

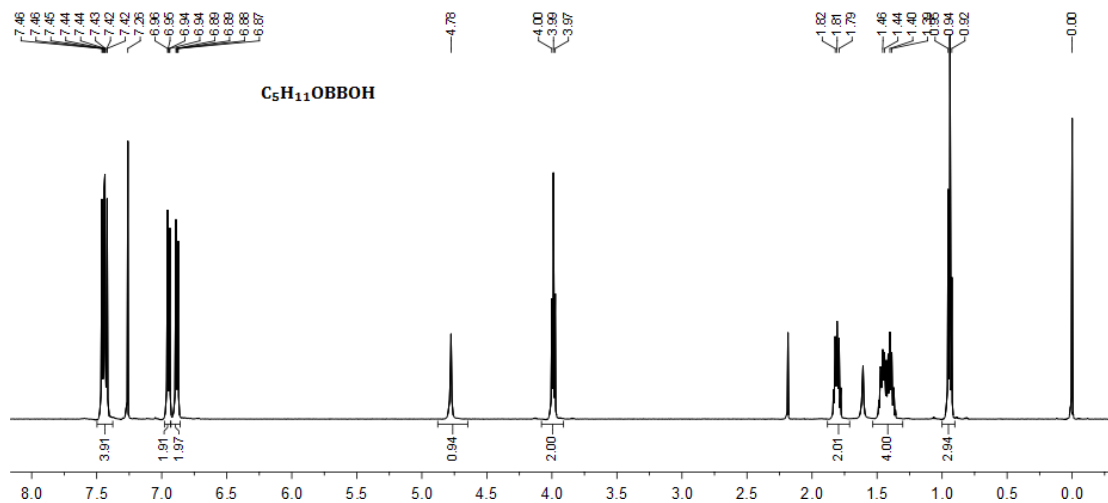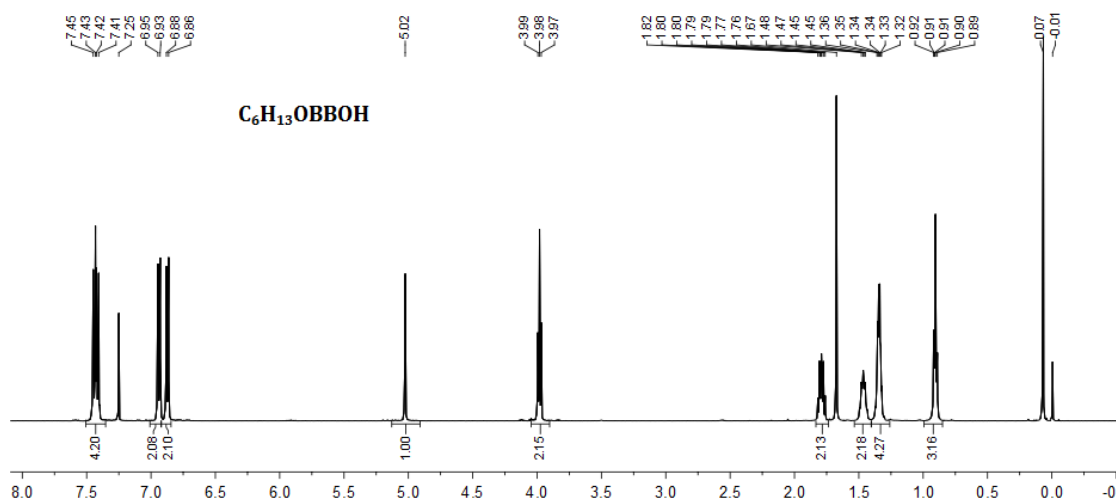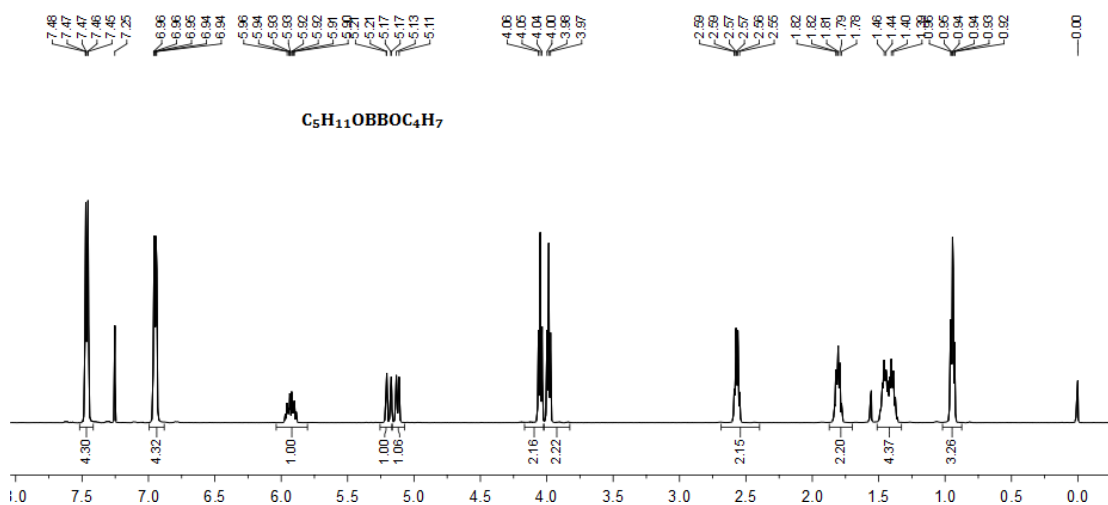

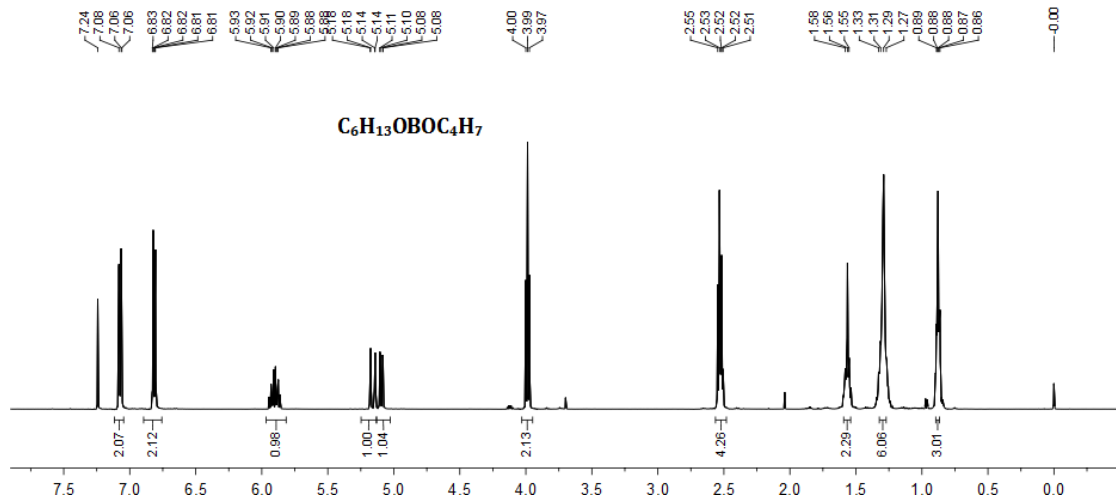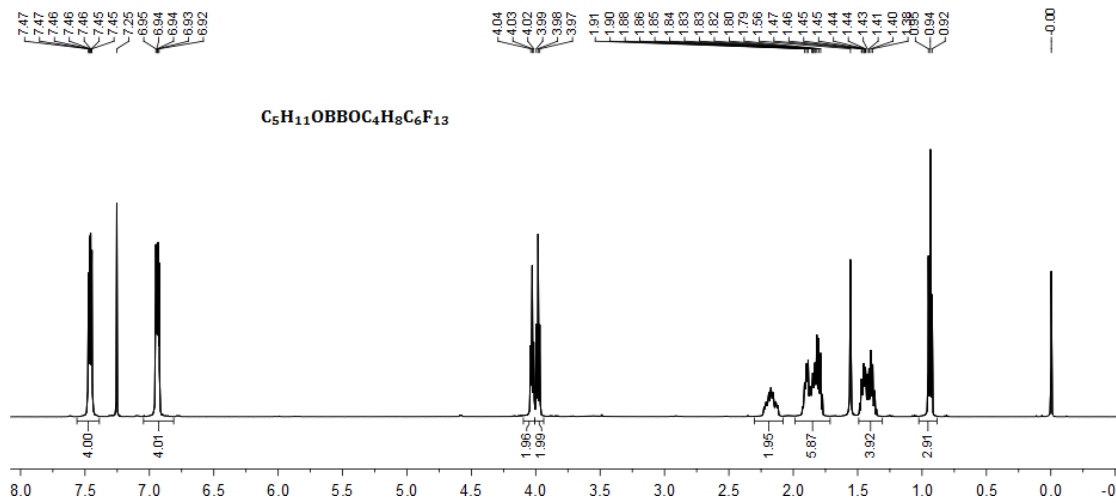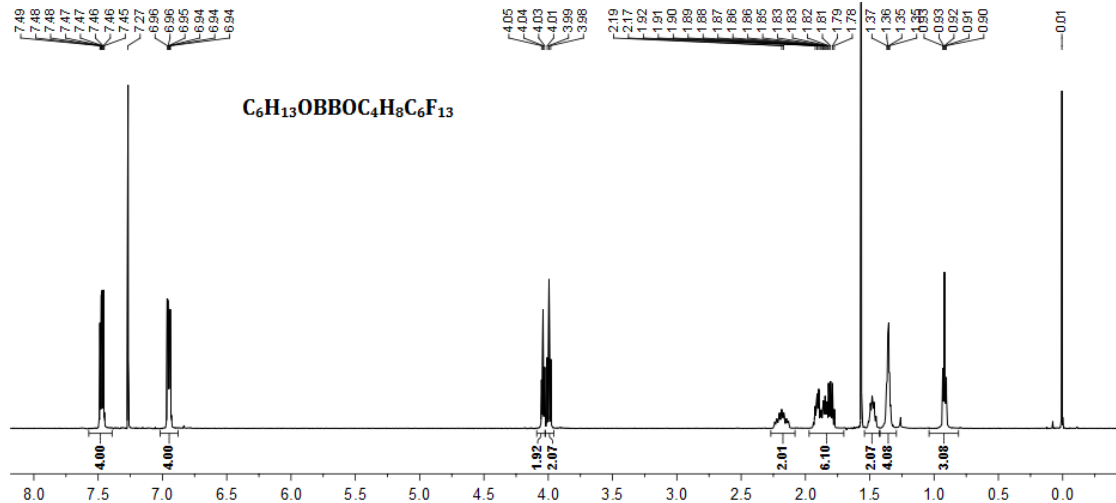

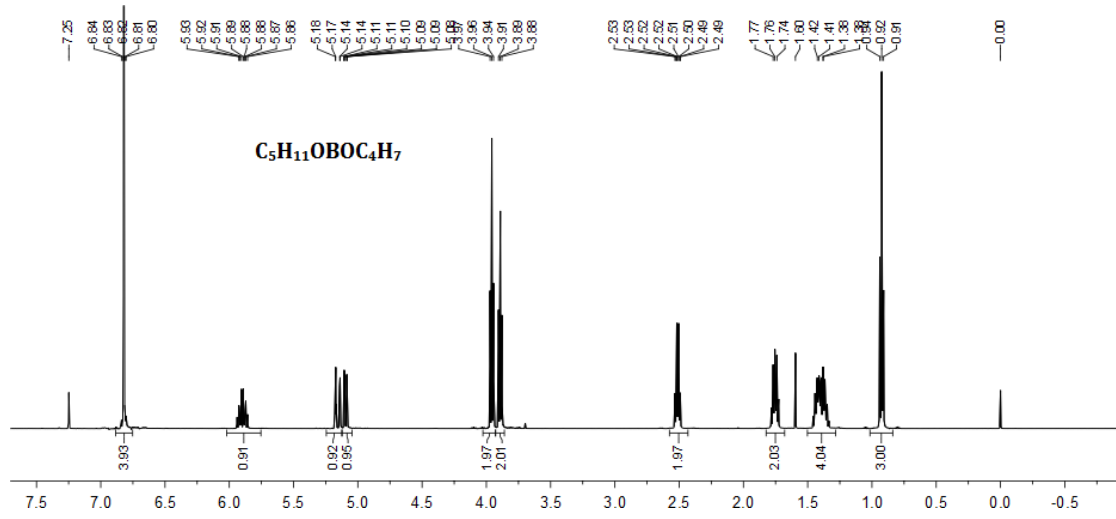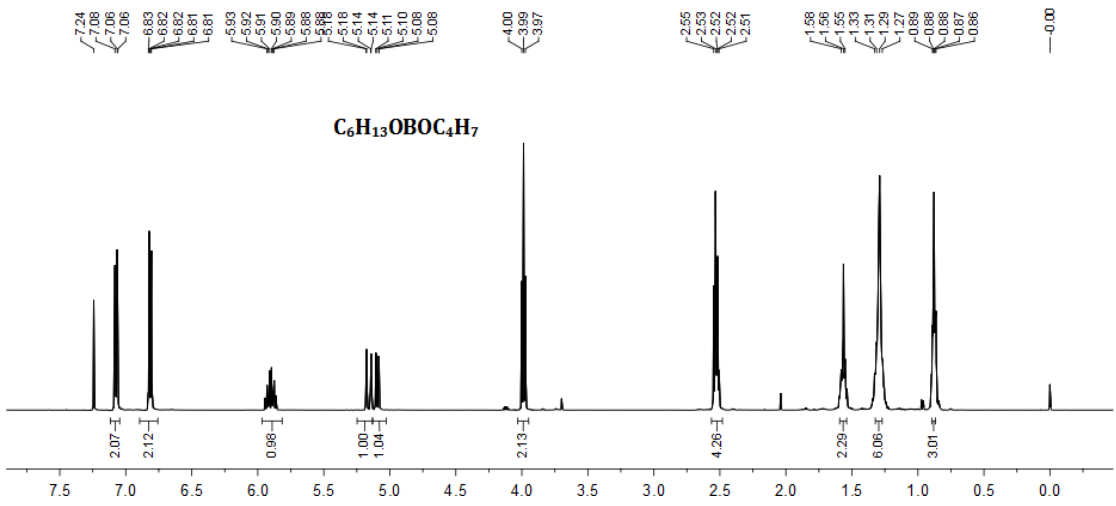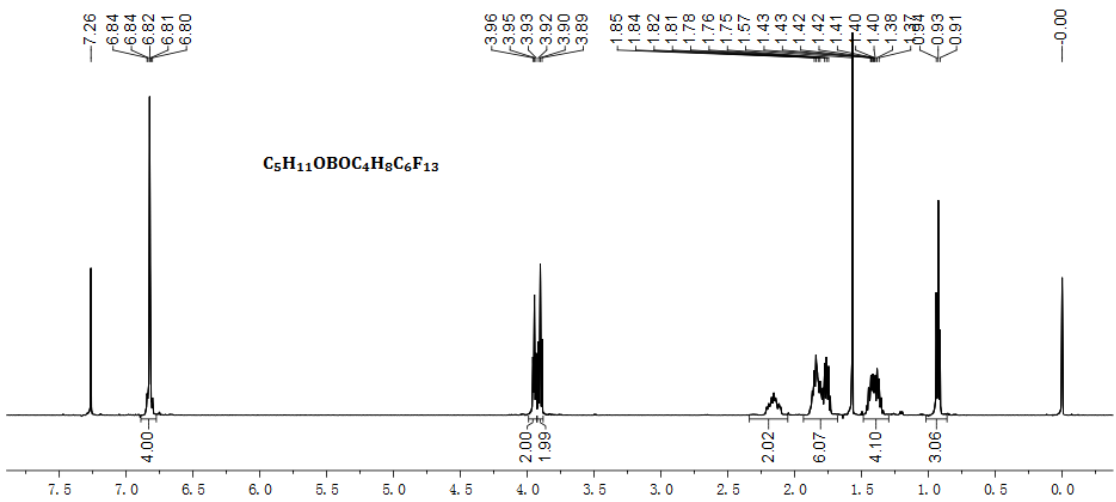

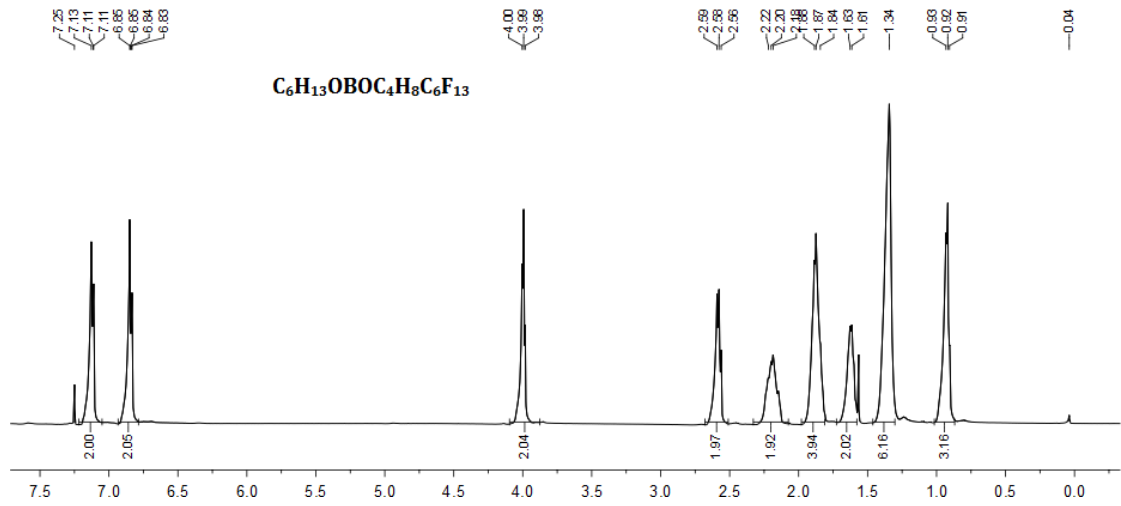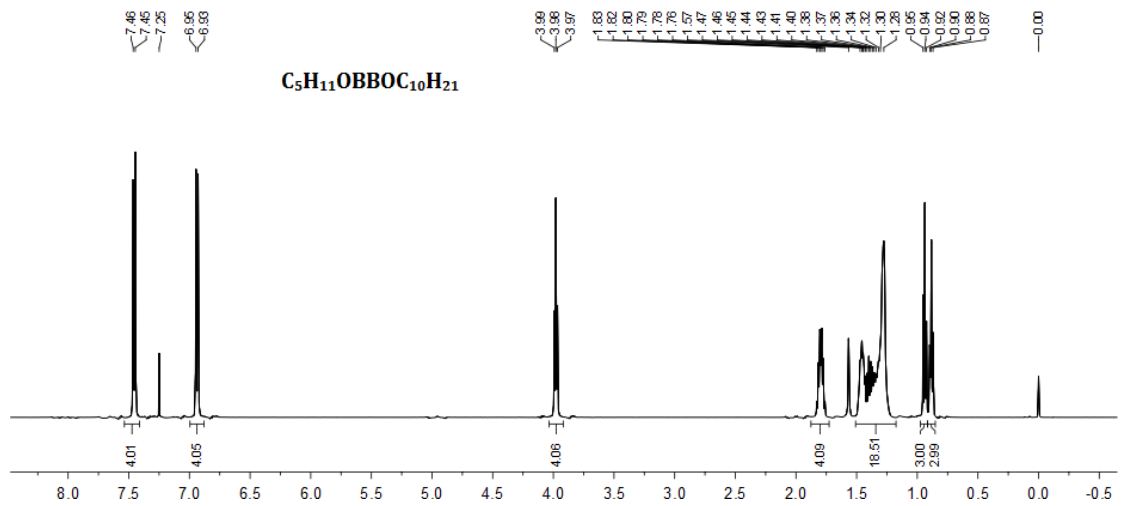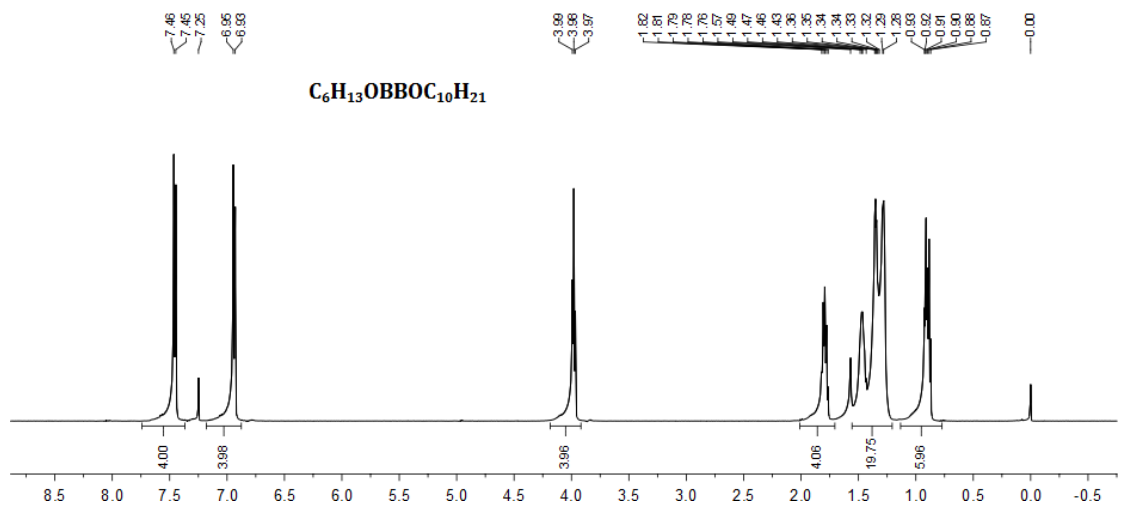

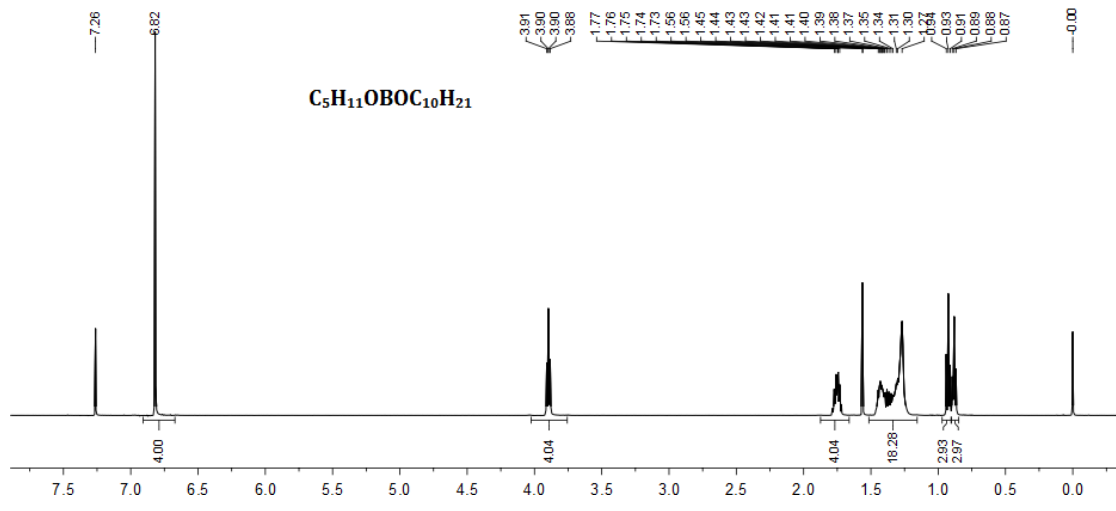

Supplement: c6nj00741d1.pdf [file c6nj00741d1.pdf]
